# Supplementary material for: Activation of the Hippo Pathway in Rana sylvatica: Yapping Stops in Response to Anoxia
Source: MDPI journal article supplement (doi:10.3390/life11121422), 2021-12-17
Supplement: s1 [file s1]

# Supplementary Material of Activation of the Hippo Pathway in *Rana sylvatica*: Yapping Stops in Response to Anoxia

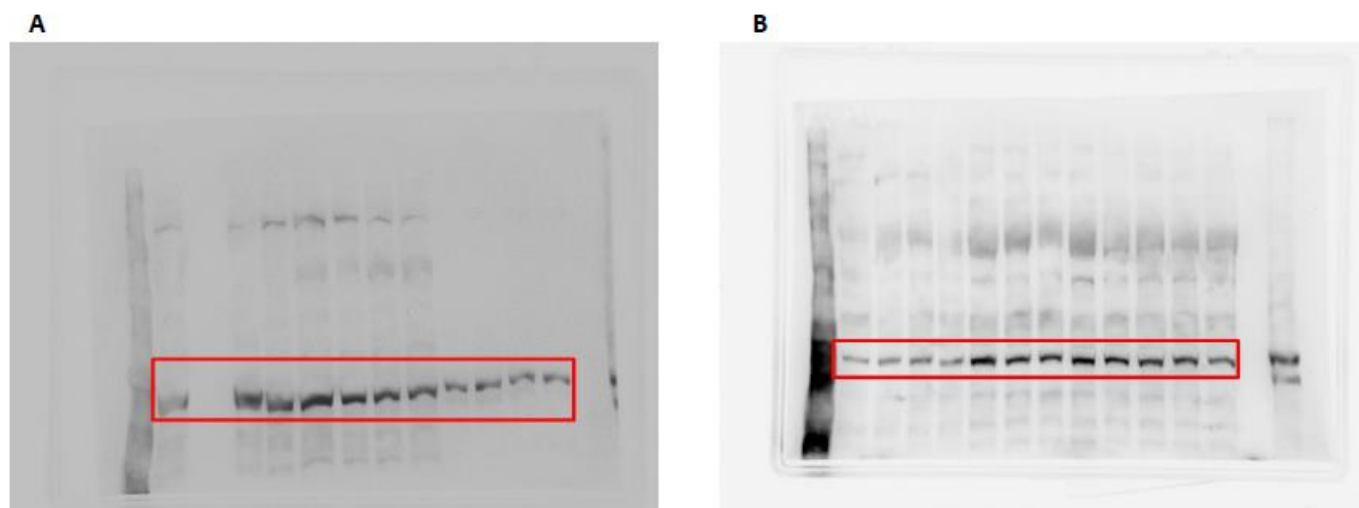

**Figure S1.** The ECL showing total protein levels of MST1 for (A) liver and (B) heart whole tissue extracts of *R. sylvatica*. Lane 1 representing a protein mol. wt. ladder, lane 2 to 5 represents control samples, lane 6 to 9 represents 24 h anoxia exposure and lane 10 to 13 represent 4 h aerobic recovery from anoxia. The protein quantified is highlighted in red.

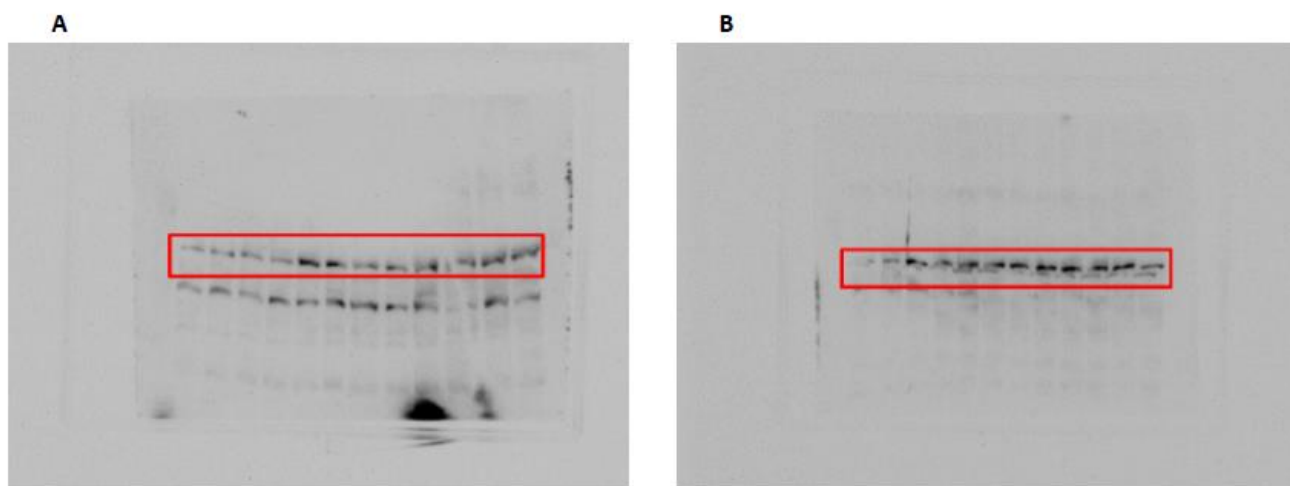

**Figure S2.** The ECL showing total protein levels of MST2 for (A) liver and (B) heart whole-tissue extracts of *R. sylvatica*. Other information similar to Figure S1.

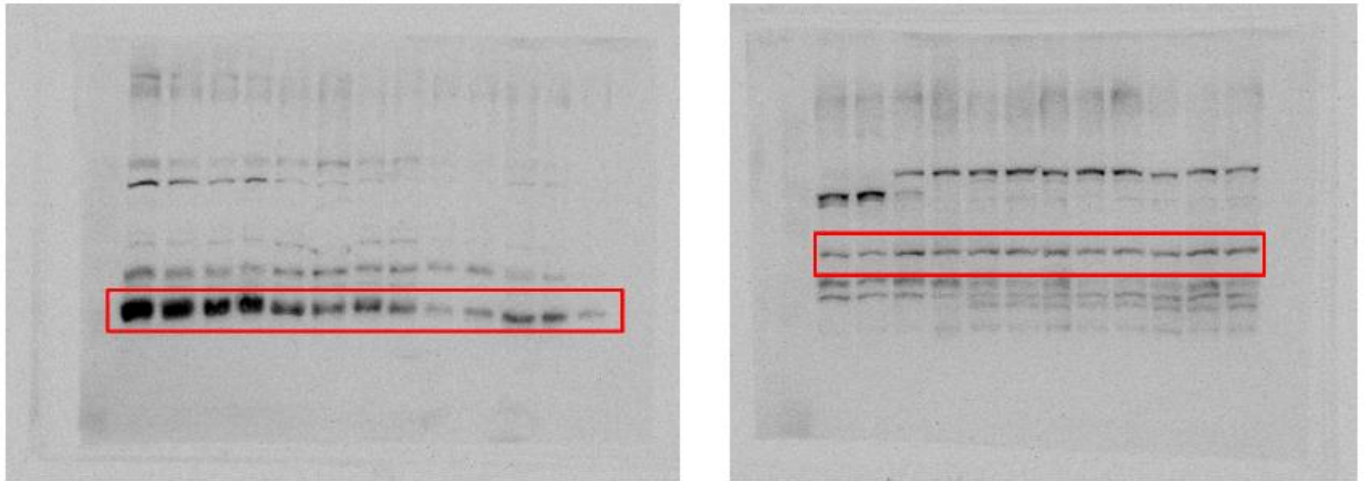

**Figure S3.** The ECL showing total protein levels of SAV for (A) liver and (B) heart whole-tissue extracts of *R. sylvatica*. Other information similar to Figure S1.

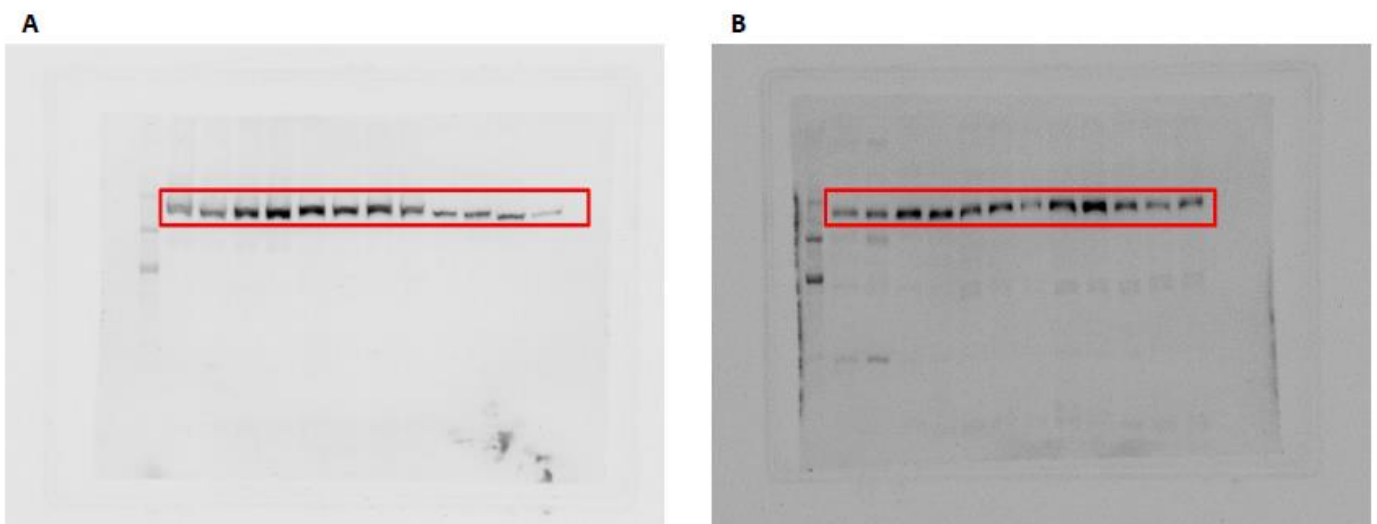

**Figure S4.** The ECL showing total protein levels of LATS for (A) liver and (B) heart whole-tissue extracts of *R. sylvatica*. Other information similar to Figure S1.

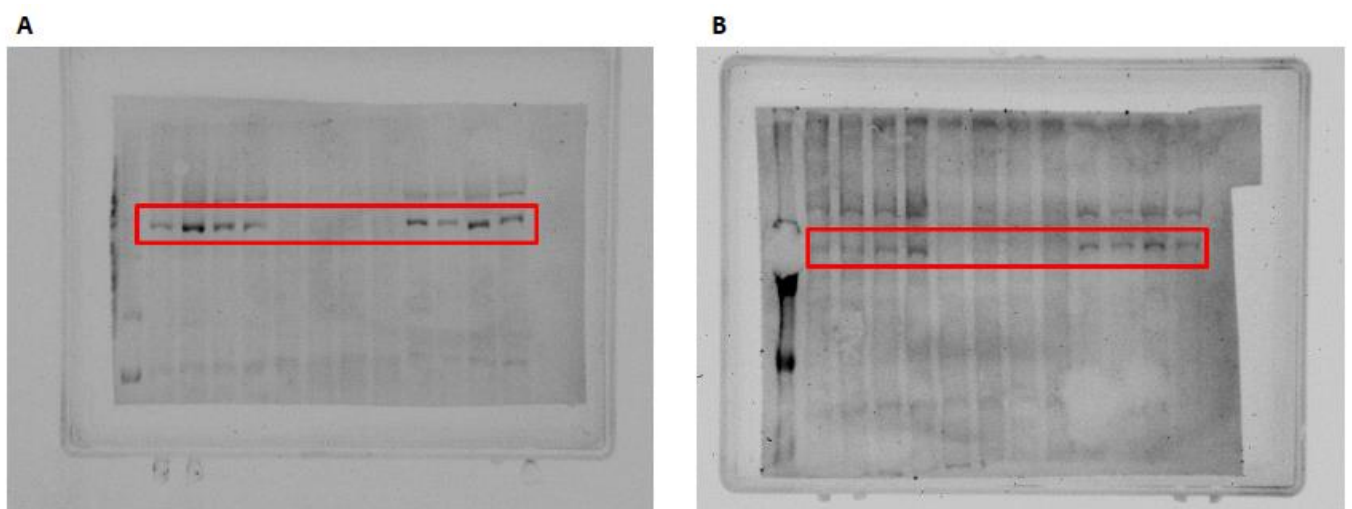

**Figure S5.** The ECL showing total protein levels of pLATS for (A) liver and (B) heart whole-tissue extracts of *R. sylvatica*. Other information similar to Figure S1.

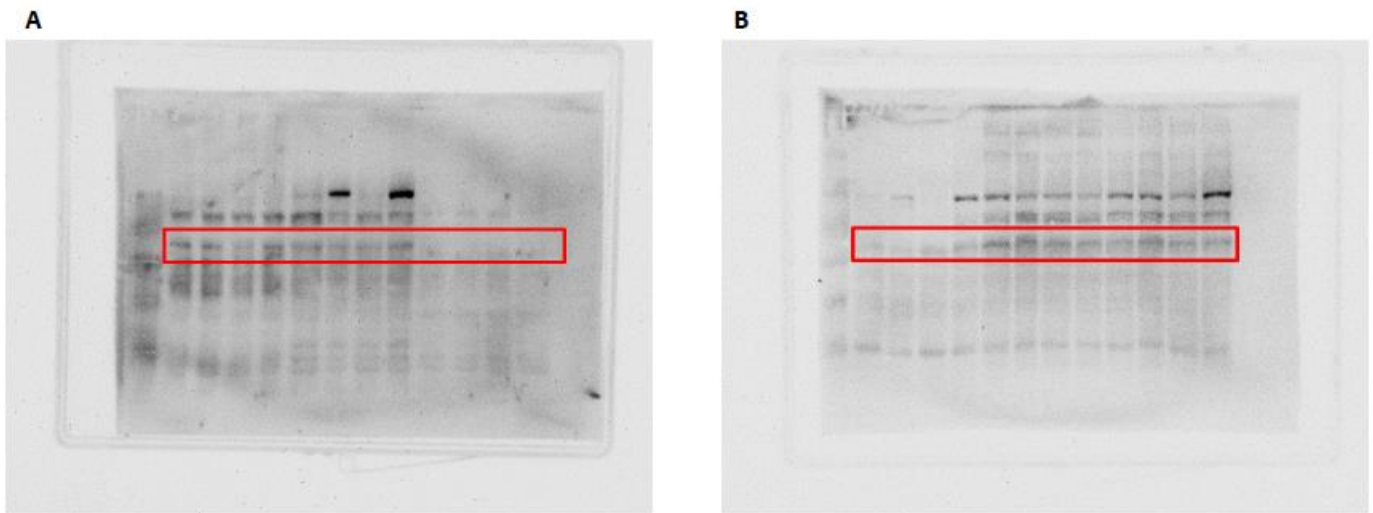

**Figure S6.** The ECL showing total protein levels of pYAP for (A) liver and (B) heart whole-tissue extracts of *R. sylvatica*. Other information similar to Figure S1.

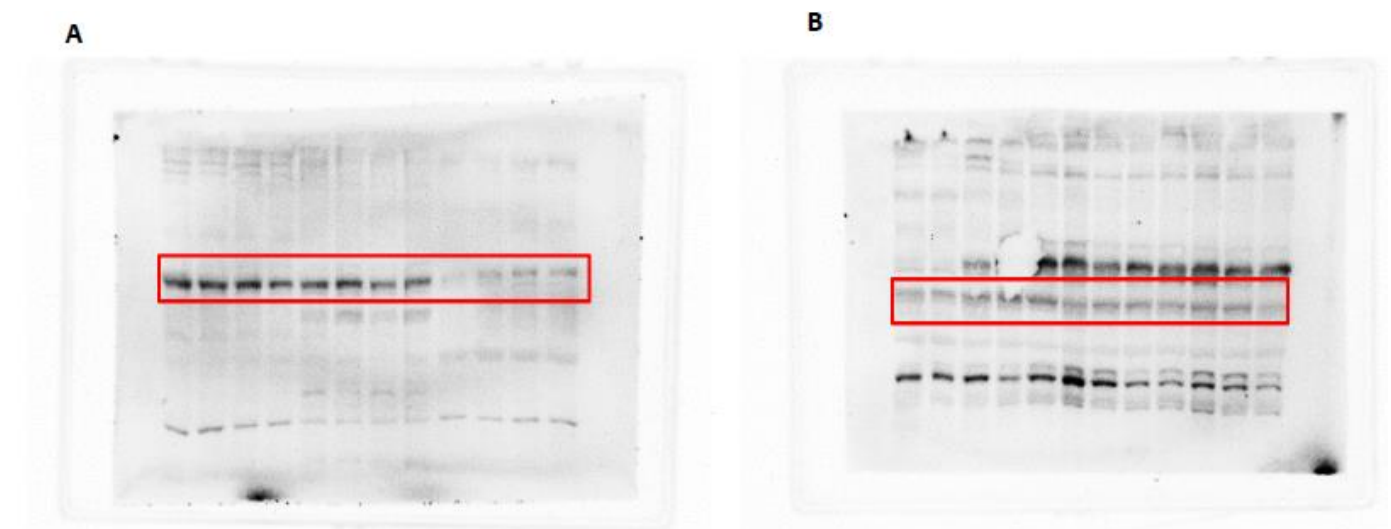

**Figure S7.** The ECL showing total protein levels of YAP for (A) liver and (B) heart whole-tissue extracts of *R. sylvatica*. Other information similar to Figure S1.

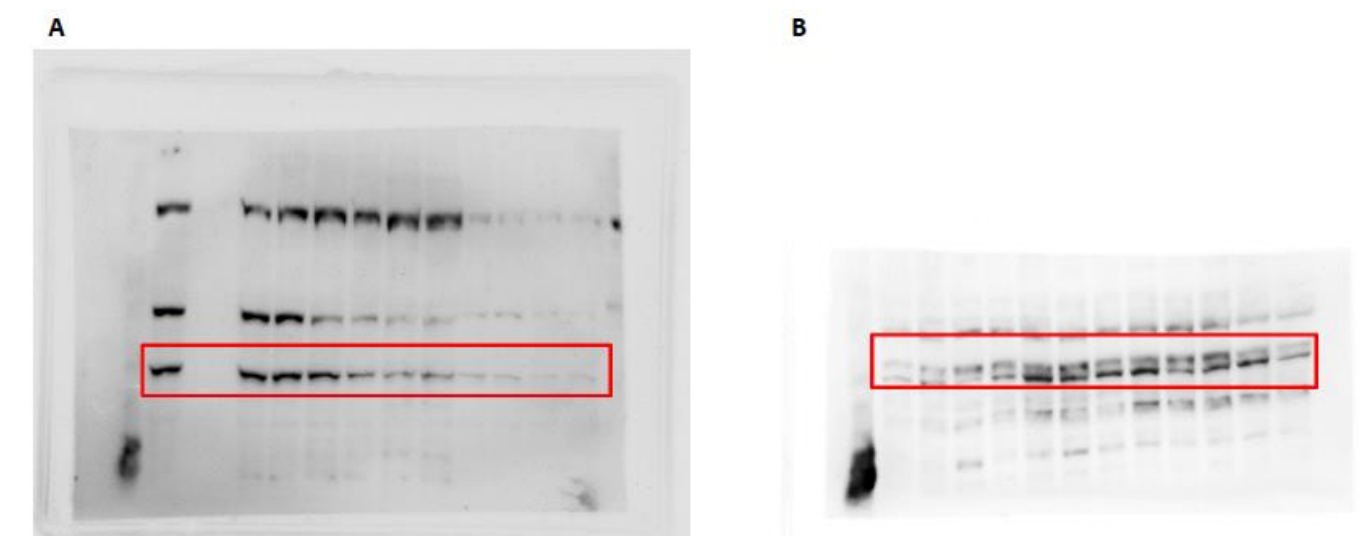

**Figure S8.** The ECL showing total protein levels of TAZ for (A) liver and (B) heart whole-tissue extracts of *R. sylvatica*. Other information similar to Figure S1.

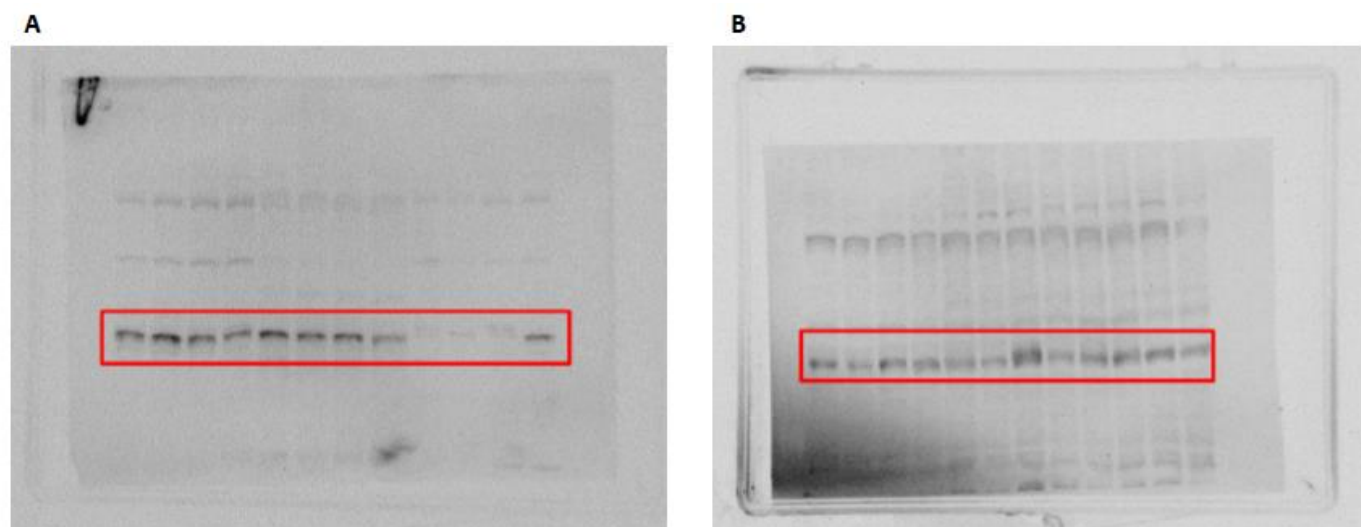

**Figure S9.** The ECL showing total protein levels of TEAD for (A) liver and (B) heart whole-tissue extracts of *R. sylvatica*. Other information similar to Figure S1.
